# Supplementary material
Source: PubMed Central journal article supplement (PMC4400772)
Supplement: JCM.03611-14_zjm999094193so1.pdf [file JCM.03611-14_zjm999094193so1.pdf]

Supplementary data

**Table S1 - Comparison of the transmission route, gender and age at diagnosis between the HIV-1 infected individuals followed at Hospital de Braga and all the available data on HIV-1 infections in Portugal by the end of 2012.**

|                          | <b>HIV-1 infections in Hospital de Braga</b> | <b>HIV-1 infections in Portugal†</b> | <b>p-value</b> |
|--------------------------|----------------------------------------------|--------------------------------------|----------------|
| Heterosexual contact     | 332 (44.4%)                                  | 18424 (43.3%)                        | 0.539          |
| IDU                      | 328 (43.9%)                                  | 15992 (37.6%)                        | <0.001***      |
| MSM                      | 71 (9.5%)                                    | 5845 (13.7%)                         | <0.001***      |
| Male                     | 573 (76.6%)                                  | 31255 (73.4%)                        | 0.039*         |
| >40 years (on diagnosis) | 200 (26.7%)                                  | 13903 (32.7%)                        | <0.001***      |
| Total                    | 748                                          | 42580                                |                |

† Data from “Instituto Nacional de Saúde Dr. Ricardo Jorge (INSA). 2012. Infeção VIH/SIDA: A Situação em Portugal a 31 de Dezembro de 2011”.\*\*\*p<0.001 \*p<0.05 binomial test. Abbreviations: IDU: intravenous drug users; MSM: men who have sex with men

**Table S2 – Transmission cluster analysis**

| <b>Cluster name</b> | <b>Number individuals</b> | <b>HIV-1 subtype</b> | <b>ML bootstrap support</b> | <b>Mean genetic distances (substitutions per site)</b> | <b>Bayesian posterior probability</b> |
|---------------------|---------------------------|----------------------|-----------------------------|--------------------------------------------------------|---------------------------------------|
| <b>01DB</b>         | 3                         | DB URF               | 100                         | 0.0201                                                 | 1                                     |
| <b>02B</b>          | 3                         | B                    | 100                         | 0.0248                                                 | 1                                     |
| <b>03B</b>          | 5                         | B                    | 100                         | 0.0212                                                 | 1                                     |
| <b>04B</b>          | 3                         | B                    | 100                         | 0.0075                                                 | 1                                     |
| <b>05B</b>          | 3                         | B                    | 100                         | 0.0151                                                 | 1                                     |
| <b>06B</b>          | 3                         | B                    | 100                         | 0.0076                                                 | 1                                     |
| <b>07B</b>          | 3                         | B                    | 100                         | 0.0134                                                 | 1                                     |
| <b>08B</b>          | 3                         | B                    | 97                          | 0.0163                                                 | 1                                     |
| <b>09G</b>          | 7                         | G                    | 100                         | 0.0247                                                 | 1                                     |
| <b>10G</b>          | 3                         | G                    | 100                         | 0.0118                                                 | 1                                     |
| <b>11C</b>          | 31                        | C                    | 98                          | 0.0209                                                 | 1                                     |
| <b>12C</b>          | 3                         | C                    | 100                         | 0.0093                                                 | 1                                     |
| <b>13F1</b>         | 10                        | F1                   | 95                          | 0.0107                                                 | 1                                     |
| <b>14F1</b>         | 7                         | F1                   | 100                         | 0.0068                                                 | 1                                     |
| <b>15F1</b>         | 4                         | F1                   | 95                          | 0.0027                                                 | 1                                     |
| <b>16A1</b>         | 8                         | A1                   | 100                         | 0.0185                                                 | 1                                     |
| <b>17BG</b>         | 12                        | CRF14_BG             | 100                         | 0.0160                                                 | 1                                     |

Abreviations: ML, Maximum likelihood
